# Supplementary material for: Prognostic value of the expression of cancer stem cell-related markers CD133 and CD44 in hepatocellular carcinoma: From patients to patient-derived tumor xenograft models
Source: PubMed Central journal article supplement (PMC5216952; doi:10.18632/oncotarget.10164), 2016-06-18
Supplement: oncotarget-07-47431-s001.pdf [file oncotarget-07-47431-s001.pdf]

## Prognostic value of the expression of cancer stem cell-related markers CD133 and CD44 in hepatocellular carcinoma: From patients to patient-derived tumor xenograft models

### Supplementary Materials

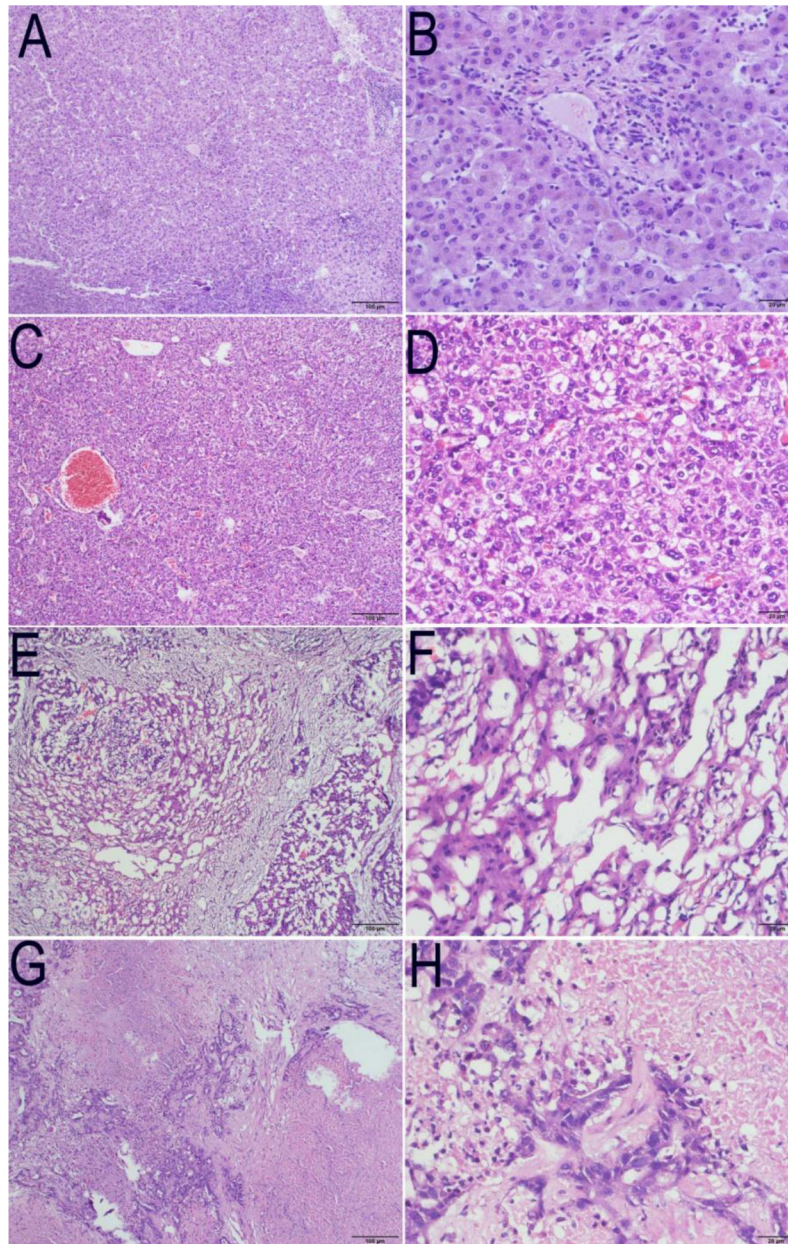

**Supplementary Figure S1: Low magnification (left panel, 100×) and high magnification (right panel, 400×) using HE staining from the IHC staining cases of the patients.** Representative case 1 HE staining (A–B) and its high expression of CD133 in Fig 2 vs case 2 HE staining (C–D) and its low expression of CD133 in Fig 2; Representative case 3 HE staining (E–F) and its high expression of CD44 in Figure 2 vs case 4 HE staining (G–H) and its low expression of CD44 in Figure 2 of the text.

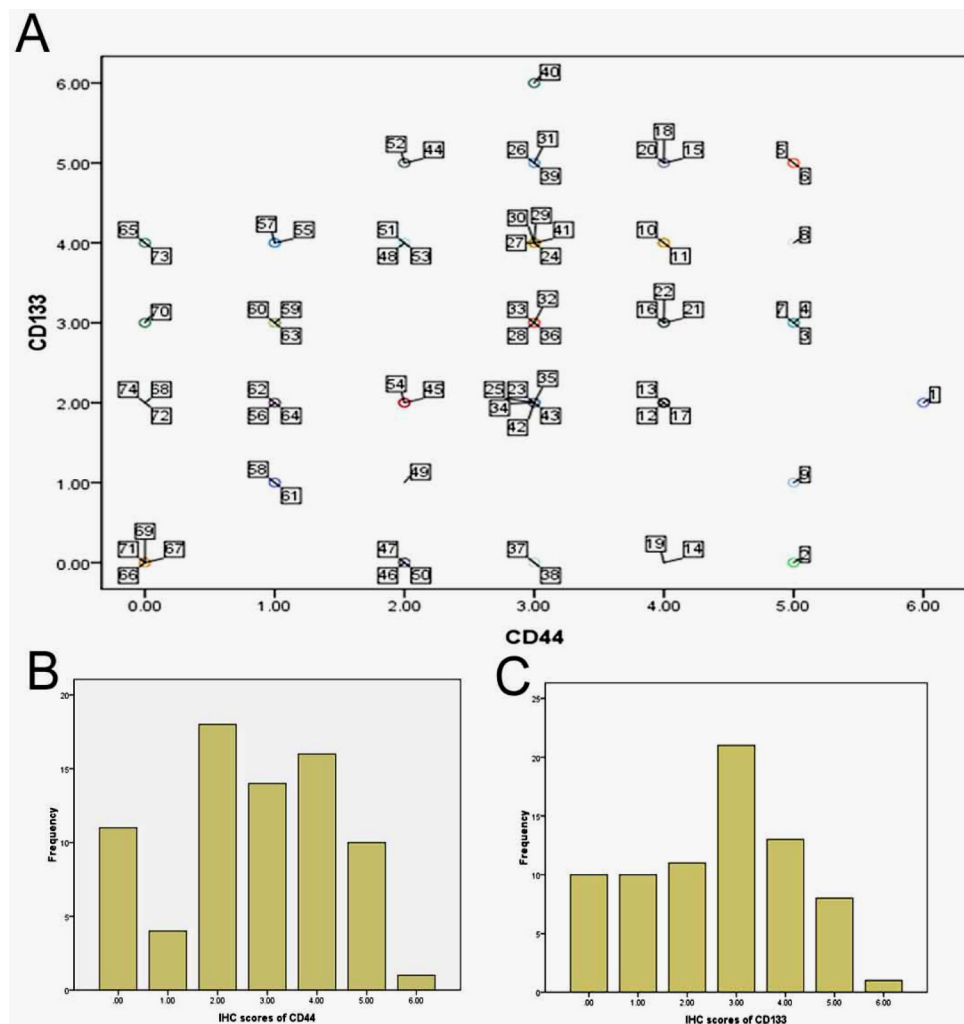

Supplementary Figure S2: Detailed quantification of samples in HCC patients stained by scoring system (A), and IHC scores of CD44 (B) and CD133 (C), respectively.

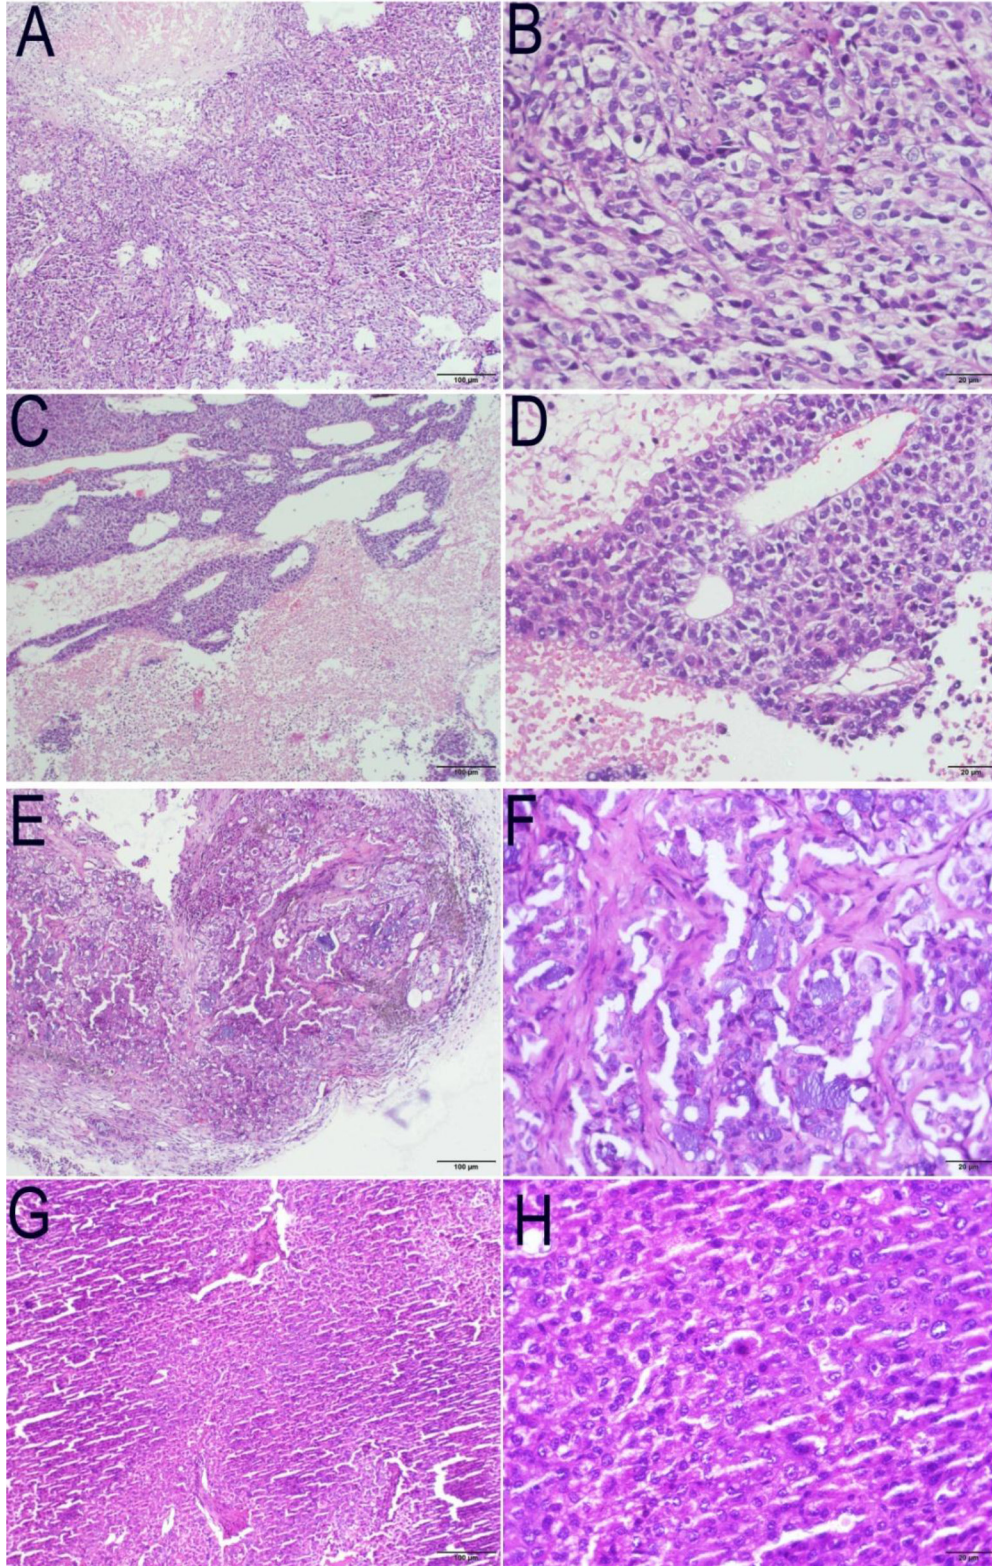

**Supplementary Figure S3: Low magnification (left panel, 100×) and high magnification (right panel, 400×) using HE staining from the IHC staining cases of the PDX models.** Representative case 1 HE staining (A–B) and its high expression of CD133 in Figure 5 vs case 2 HE staining (C–D) and its low expression of CD133 in Fig 5; Representative case 3 HE staining (E–F) and its high expression of CD44 in Fig 5 vs case 4 HE staining (G–H) and its low expression of CD44 in Figure 5 of the text.

**Supplementary Table S1: The primer sequence of 12 CSC markers**

| Gene     | Primers (5'→3')                                              | GenBank Accession |
|----------|--------------------------------------------------------------|-------------------|
| CD133    | Fwd TGGATGCAGAACTTGACAACGT<br>Rev ATACCTGCTACGACAGTCGTGGT    | NM_006017.2       |
| CD90     | Fwd GACCCGTGAGACAAAGAAGC<br>Rev GCCCTCACACTTGACCAGTT         | NM_006288.4       |
| CD44     | Fwd ATGGACAAGTTTTGGTGGCACGC<br>Rev AAGATGTAACCTCCTGAAGTGCTGC | NM_001202556.1    |
| ALDH1    | Fwd ATCTTTGCTGACTGTGACCT<br>Rev GCACCTCTTCTACCACTCTC         | NM_012190.3       |
| Vimentin | Fwd GGGACCTCTACGAGGAGGAG<br>Rev CGCATTGTCAACATCCTGTC         | NM_003380.3       |
| Oct-4    | Fwd GCAGCGACTATGCACAACGA<br>Rev CCAGAGTGGTGACGGAGACA         | NM_002701         |
| Sox-2    | Fwd CATCACCCACAGCAAATGACA<br>Rev GCTCCTACCGTACCACTAGAACTT    | NM_003106.2       |
| CK 7     | Fwd TGAATGATGAGATCAACTTCCTCAG<br>Rev TGTCGGAGATCTGGGACTGC    | NM_005556.3       |
| CK19     | Fwd CGGGCATAAAAGGCGCCAGGT<br>Rev GAGACCCCGAAGACGACAGGAAAC    | NM_182920.1       |
| Nestin   | Fwd TCGCTTAGAGGTGCAACAGC<br>Rev CTCTGTAGACCTTGCTTCTCC        | NM_012987         |
| CD13     | Fwd ACGCCACCTCTACATCATC<br>Rev AGCACCACTCCTTGTTCTC           | NM_001150         |
| EpCam    | Fwd AGCTCAGGAAGAATGTG<br>Rev TGAAGTACACTGGCATTGACG           | NM_002354         |
| GAPDH    | Fwd AATGAAGGGGTCATTGATGG<br>Rev AAGGTGAAGGTTCGGAGTCAA        | NM_002046         |

**Supplementary Table S2: The IHC scores in CD44 high/low groups and CD133 high/low groups in PDX models**

| # of mice | Scores of CD44 expression in CD133 low group | # of mice | Scores of CD44 expression in CD133 high group | # of mice | Scores of CD133 expression in CD44 low group | # of mice | Scores of CD133 expression in CD44 high group |
|-----------|----------------------------------------------|-----------|-----------------------------------------------|-----------|----------------------------------------------|-----------|-----------------------------------------------|
| 1         | 4                                            | 1         | 5                                             | 1         | 5                                            | 1         | 5                                             |
| 2         | 2                                            | 2         | 5                                             | 2         | 2                                            | 2         | 4                                             |
| 3         | 1                                            | 3         | 2                                             | 3         | 3                                            | 3         | 2                                             |
| 4         | 2                                            | 4         | 2                                             | 4         | 2                                            | 4         | 2                                             |
| 5         | 2                                            | 5         | 3                                             | 5         | 2                                            | 5         | 2                                             |
| 6         | 2                                            | 6         | 3                                             | 6         | 3                                            | 6         | 1                                             |
|           |                                              | 7         | 5                                             |           |                                              | 7         | 3                                             |
|           |                                              | 8         | 5                                             |           |                                              | 8         | 2                                             |
|           |                                              | 9         | 4                                             |           |                                              | 9         | 3                                             |
|           |                                              | 10        | 1                                             |           |                                              | 10        | 2                                             |
|           |                                              | 11        | 2                                             |           |                                              | 11        | 5                                             |
|           |                                              | 12        | 2                                             |           |                                              | 12        | 3                                             |
|           |                                              | 13        | 4                                             |           |                                              | 13        | 1                                             |
|           |                                              | 14        | 3                                             |           |                                              | 14        | 3                                             |
|           |                                              | 15        | 2                                             |           |                                              | 15        | 3                                             |
|           |                                              | 16        | 6                                             |           |                                              | 16        | 2                                             |
|           |                                              | 17        | 2                                             |           |                                              | 17        | 2                                             |
|           |                                              | 18        | 3                                             |           |                                              | 18        | 3                                             |
